# Supplementary material for: Remarkable hydrogen storage properties for nanocrystalline MgH2 synthesised by the hydrogenolysis of Grignard reagents
Source: Royal Society of Chemistry journal article supplement (doi:10.1039/c2cp41140g), 2012-01-01
Supplement: c2cp41140g.pdf [file c2cp41140g.pdf]

## Supplementary Information

### **Remarkable hydrogen storage properties for nanocrystalline MgH<sub>2</sub> synthesised by the hydrogenolysis of Grignard reagents**

Eki J. Setijadi,<sup>1,2</sup> Cyrille Boyer,<sup>2</sup> and Kondo-Francois Aguey-Zinsou<sup>1,\*</sup>

<sup>1</sup>Merlin group, ARC Center for Functional Nanomaterials, School of Chemical Engineering, The University of New South Wales, Sydney NSW 2052, Australia.

<sup>2</sup>Center for Advanced Macromolecular Design, School of Chemical Engineering, The University of New South Wales, Sydney NSW 2052, Australia

E-mail: f.aguey@unsw.edu.au, Tel: +61 (0)2 938 57970, Fax: +61 (0)2 938 55966

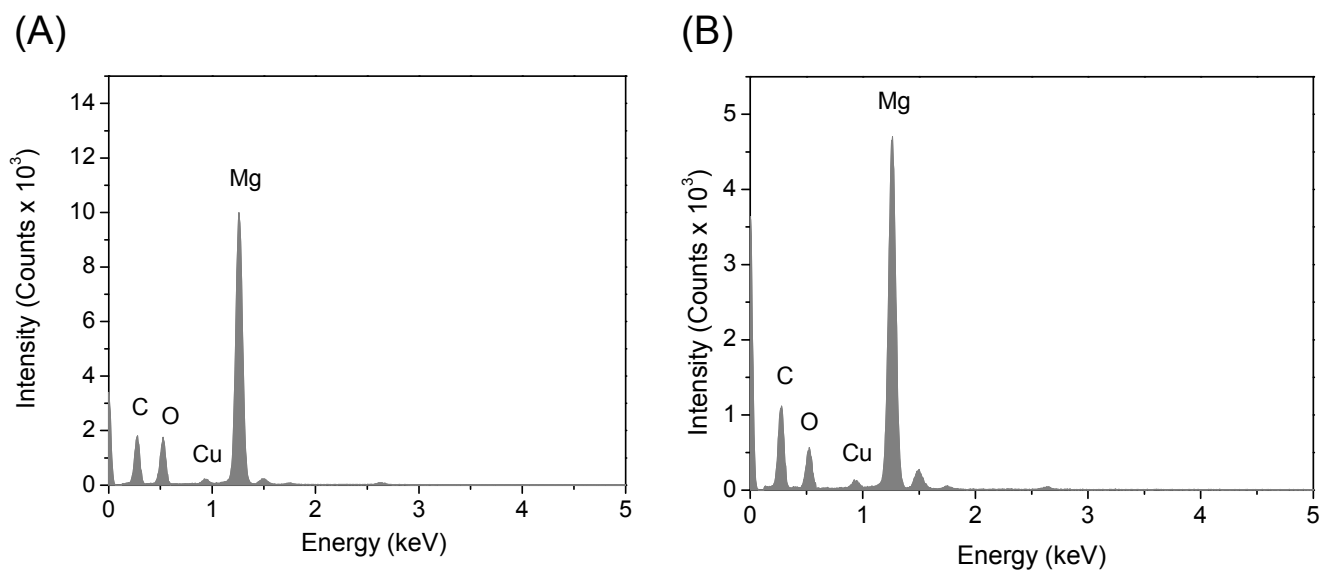

**Figure S1.** EDX analysis of H<sub>2</sub>-DibutylMg (A) after hydrogenolysis - corresponding to Figure 5A and (B) after cycling - corresponding to Figure 8D.

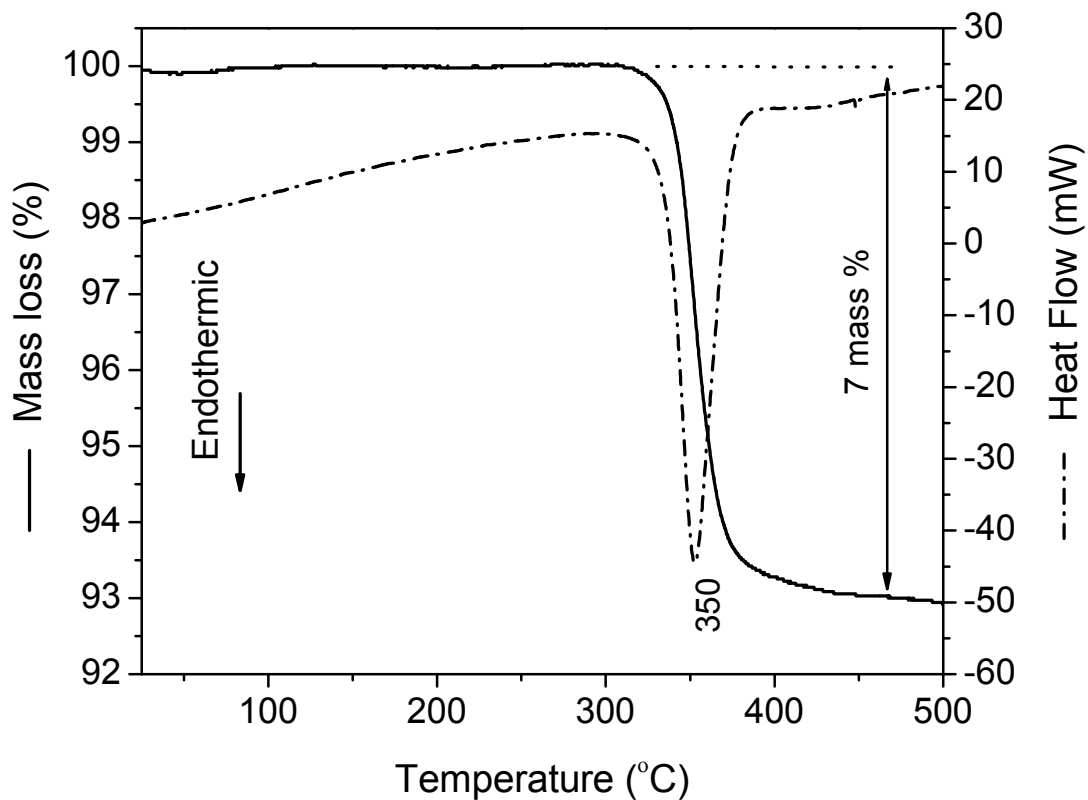

**Figure S2.** TGA/DSC of H<sub>2</sub>-DibutylMg after the first hydrogen cycle. Measurement done with a heating rate of 10 °C.min<sup>-1</sup> and under a 25 ml.min<sup>-1</sup> Ar flow.

H<sub>2</sub>-DibutylMg released 7 mass % of hydrogen in agreement with the hydrogen storage capacity measured during cycling, i.e. 6.8 mass %.

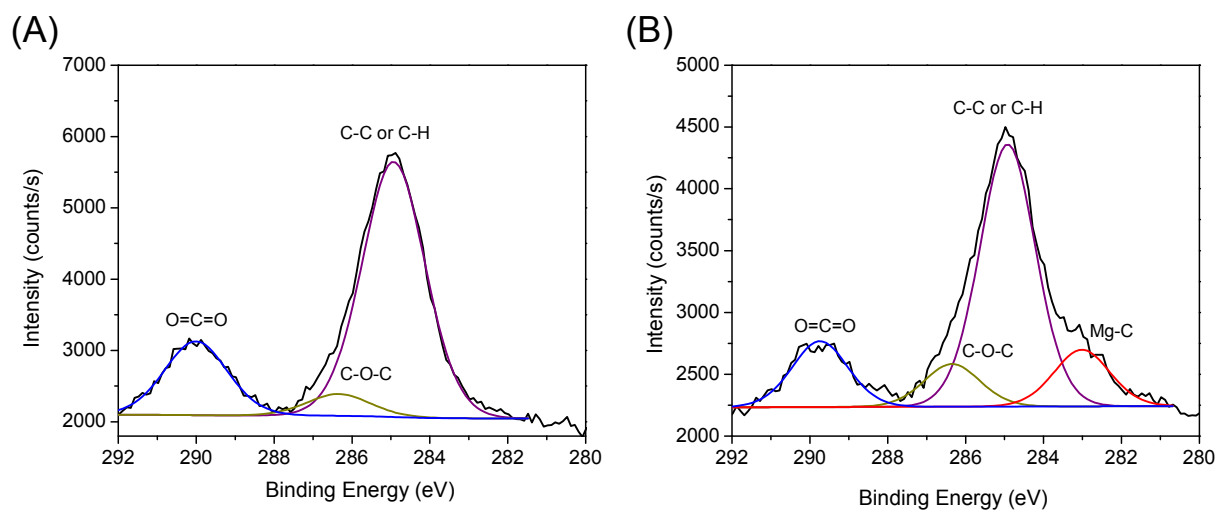

**Figure S3.** XPS narrow-scan of C1s for H<sub>2</sub>-DibutylMg (A) resulting from the hydrogenolysis of di-*n*-butylmagnesium and (B) after the first hydrogen absorption/desorption cycle.

The peak at 289.7 eV was assigned to CO<sub>2</sub> adsorption at the magnesium surface,<sup>1</sup> and the peak at 286.3 eV to C-O-C bond and thus hydrocarbon contamination<sup>2, 3</sup> (Such hydrocarbon contamination may come from THF vapor to be found in our glove box). The peak at 284.9 eV may correspond to C-C or C-H,<sup>2, 3</sup> and the peak at 282.5 eV was assigned to Mg-C bond.<sup>4</sup>

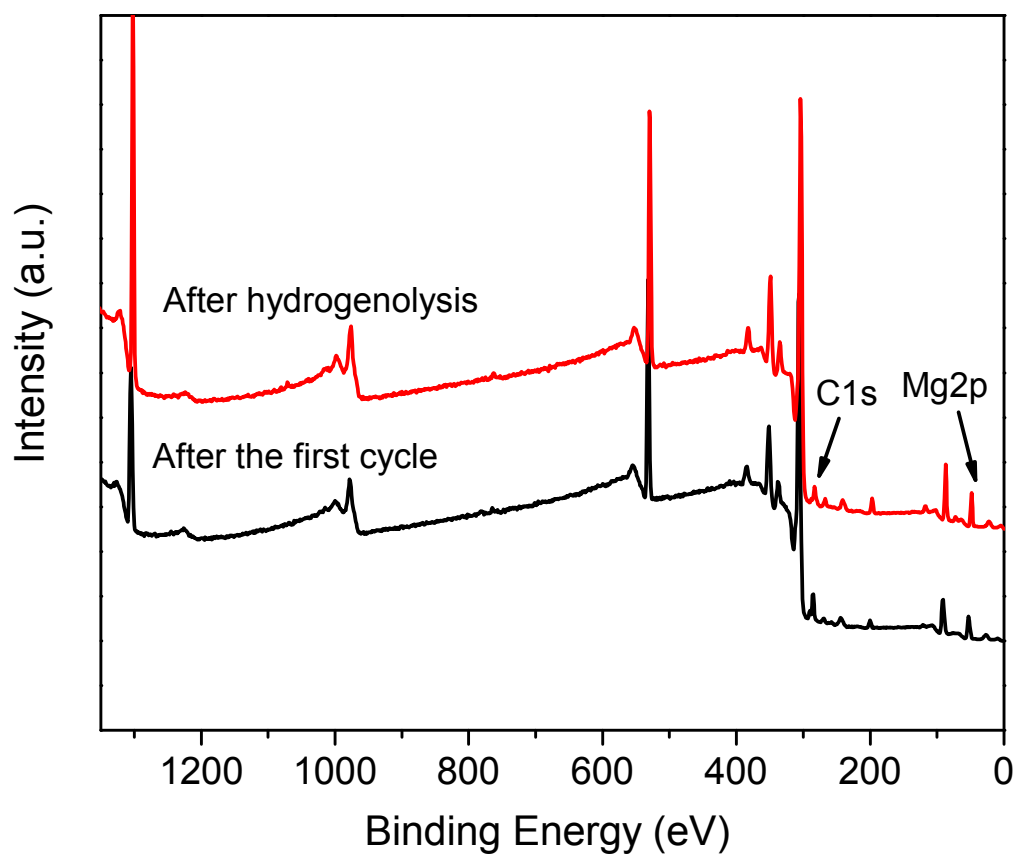

**Figure S4.** XPS wide-scan for H<sub>2</sub>-DibutylMg (A) after hydrogenolysis and (B) after the first hydrogen absorption/desorption cycle.

1. H. Onishi, C. Egawa, T. Aruga and Y. Iwasawa, *Surf. Sci.*, 1987, **191**, 479-491.
2. C. D. Wagner, W. M. Riggs, L. E. Davis and J. F. Moulder, *Handbook of X-Ray Photoelectron Spectroscopy*, Perkin & Elmer Cooperation, 1997.
3. C. Fotea, J. Callaway and M. R. Alexander, *Surf. Interface Anal.*, 2006, **38**, 1363-1371.
4. A. S. Ingason, A. K. Eriksson, E. Lewin, J. Jensen and S. Olafsson, *Thin Solid Films*, 2010, **518**, 4225-4230.
